# Supplementary material for: Latent Semantic Indexing of PubMed abstracts for identification of transcription factor candidates from microarray derived gene sets
Source: PubMed Central journal article supplement (PMC3236841; doi:10.1186/1471-2105-12-s10-s19), 2011-10-18
Supplement: 1471-2105-12-S10-S19-S1.pdf [file 1471-2105-12-S10-S19-S1.pdf]

## Supplementary Information

Supplementary Table 1. DEGs for five microarray datasets used in the study.

| List of DEGs   |                 |                 |                |                  |
|----------------|-----------------|-----------------|----------------|------------------|
| Interferon     | IL-4            | Tunicamycin     | GH             | TGF- $\beta$ 1   |
| <i>Isg15</i>   | 9030425E11Rik   | <i>Dnajc3</i>   | <i>Apol7c</i>  | <i>Mex3b</i>     |
| <i>Blmh</i>    | <i>Arg1</i>     | <i>Zbtb48</i>   | <i>Birc3</i>   | <i>Adm</i>       |
| D17H6S56E-5    | <i>Arhgap18</i> | <i>Adm</i>      | <i>Bcl2a1a</i> | <i>Alcam</i>     |
| <i>Aim1</i>    | <i>Arrdc3</i>   | <i>Apobec1</i>  | <i>Bcl3</i>    | <i>Cdk5r1</i>    |
| <i>Ankfy1</i>  | <i>Ass1</i>     | <i>Pdia4</i>    | <i>Bcl2l11</i> | <i>Col3a1</i>    |
| <i>Apobec1</i> | <i>Ccl24</i>    | <i>Cbx4</i>     | <i>C3</i>      | <i>Epha3</i>     |
| <i>Apod</i>    | <i>Cd14</i>     | <i>Clcn3</i>    | <i>Cd14</i>    | <i>Fbln2</i>     |
| <i>Casp12</i>  | <i>Cd28</i>     | <i>Clk4</i>     | <i>Cd69</i>    | <i>Fgf18</i>     |
| <i>Socs1</i>   | <i>Cd93</i>     | <i>Gadd45a</i>  | <i>Cd83</i>    | <i>Ctgf</i>      |
| <i>Cyp26a1</i> | <i>Cerkl</i>    | <i>Dmp1</i>     | <i>Ch25h</i>   | <i>Foxc2</i>     |
| <i>Daxx</i>    | <i>Cxcl10</i>   | <i>Gas1</i>     | <i>Cish</i>    | <i>Foxs1</i>     |
| <i>Gbp2</i>    | <i>Cxcr4</i>    | <i>Gcnt2</i>    | <i>Socs3</i>   | <i>Hbegf</i>     |
| <i>Gnb4</i>    | <i>Ear11</i>    | <i>Nr4a1</i>    | <i>Dusp2</i>   | <i>Nr4a1</i>     |
| H2-D1          | <i>Emr4</i>     | <i>Hoxa1</i>    | <i>Gem</i>     | <i>Id1</i>       |
| H2-K1          | <i>Entpd1</i>   | <i>Elovl6</i>   | <i>Cxcl1</i>   | <i>Id2</i>       |
| H2-L           | <i>F10</i>      | <i>Ppp1r15a</i> | <i>Icam1</i>   | <i>Id3</i>       |
| H2-T10         | <i>Fcgr4</i>    | <i>Gadd45b</i>  | <i>Cxcl10</i>  | <i>Id4</i>       |
| H2-T22         | <i>Flt1</i>     | <i>Piga</i>     | <i>Il12b</i>   | <i>Ier3</i>      |
| <i>Htr1d</i>   | <i>Fn1</i>      | <i>Pim1</i>     | <i>Il1a</i>    | <i>Ier5</i>      |
| <i>Irgm1</i>   | <i>Fpr1</i>     | <i>Ptger4</i>   | <i>Il1b</i>    | <i>Cyr61</i>     |
| <i>Cxcl10</i>  | <i>Gpc1</i>     | <i>Rad52</i>    | <i>Irg1</i>    | <i>Lif</i>       |
| <i>Ifi203</i>  | <i>Ifit2</i>    | <i>Sel1l</i>    | <i>Hivep3</i>  | <i>Gadd45b</i>   |
| <i>Ifi204</i>  | <i>Ifit3</i>    | <i>Siah2</i>    | <i>Mup2</i>    | <i>Nedd9</i>     |
| <i>Ifit1</i>   | <i>Ifitm6</i>   | <i>St6gal1</i>  | <i>Nfkbia</i>  | <i>Nrp1</i>      |
| <i>Ifit2</i>   | <i>Igfbp4</i>   | <i>Snai2</i>    | <i>Nfkbie</i>  | <i>Tnfrsf11b</i> |
| <i>Ifit3</i>   | <i>Il1b</i>     | <i>Taf1a</i>    | <i>Pde4b</i>   | <i>Pim1</i>      |
| <i>Igtp</i>    | <i>Il4i1</i>    | <i>Zfp354a</i>  | <i>Phf21a</i>  | <i>Serpine1</i>  |
| <i>Il13ra1</i> | <i>Itga4</i>    | <i>Zfp322a</i>  | <i>Relb</i>    | <i>Ptgs2</i>     |
| <i>Il6</i>     | <i>Itga9</i>    | <i>Kdm6a</i>    | <i>Saa3</i>    | <i>Sgk1</i>      |
| <i>Cd47</i>    | <i>Itgax</i>    | <i>Uhrf1bp1</i> | <i>Ccl2</i>    | <i>Skil</i>      |
| <i>Jak2</i>    | <i>Mgl2</i>     | <i>Zfp105</i>   | <i>Ccl3</i>    | <i>Slc20a1</i>   |
| <i>Lgals9</i>  | <i>Mmp9</i>     | <i>Zfp30</i>    | <i>Ccl4</i>    | <i>Snai1</i>     |
| <i>Psmb8</i>   | <i>Pdcd1lg2</i> | <i>Zfp51</i>    | <i>Ccl5</i>    | <i>Csrnp1</i>    |
| <i>Ly6e</i>    | <i>Pde3b</i>    | <i>Zfp60</i>    | <i>Ccl7</i>    | <i>Wnt9a</i>     |
| <i>Mov10</i>   | <i>Hpgds</i>    | <i>Zfp61</i>    | <i>Cxcl2</i>   | <i>Klf10</i>     |
| <i>Mx1</i>     | <i>Rcbtb2</i>   | <i>Zscan12</i>  | <i>Cxcl5</i>   | <i>Zfp503</i>    |
| <i>Mx2</i>     | <i>Retnla</i>   | <i>Zfp97</i>    | <i>Cx3cl1</i>  | <i>Spata13</i>   |

|                  |                |                |                 |                      |
|------------------|----------------|----------------|-----------------|----------------------|
| <i>Myd88</i>     | <i>Rnf144b</i> | <i>Zfpm2</i>   | <i>Slfn2</i>    | <i>Gadd45g</i>       |
| <i>Plscr2</i>    | <i>Saa3</i>    | <i>Rabepk</i>  | <i>Nlrp3</i>    | <i>Ppp1r3c</i>       |
| <i>Pml</i>       | <i>Scd2</i>    | <i>Trib3</i>   | <i>Tnf</i>      | <i>Map3k14</i>       |
| <i>Lgals3bp</i>  | <i>Sepp1</i>   | <i>Dnajb9</i>  | <i>Tnfaip2</i>  | <i>Slc40a1</i>       |
| <i>Eif2ak2</i>   | <i>Slc40a1</i> | <i>Sfrs17b</i> | <i>Tnfaip3</i>  | <i>Txnip</i>         |
| <i>Psmb10</i>    | <i>Slc7a11</i> | <i>Txnip</i>   | <i>Tnfrsf1b</i> | <i>Pmepa1</i>        |
| <i>Psme1</i>     | <i>Slc7a2</i>  | <i>Herpud1</i> | <i>Cd40</i>     | <i>1190002H23Rik</i> |
| <i>Serpinb9</i>  | <i>Stk17b</i>  | <i>Zfp110</i>  | <i>Tnfsf9</i>   | <i>2810474O19Rik</i> |
| <i>Trim21</i>    | <i>Thbs1</i>   | <i>Trappc5</i> | <i>Slc2a6</i>   | <i>Rasl11b</i>       |
| <i>Stxbp1</i>    | <i>Tlr2</i>    | <i>Trim59</i>  | <i>Zc3h12a</i>  | <i>Bcor</i>          |
| <i>Tap1</i>      | <i>Tlr7</i>    | <i>Rnmt1</i>   | <i>Malt1</i>    | <i>Nuak2</i>         |
| <i>Tap2</i>      | <i>Tm7sf4</i>  | <i>Ero11b</i>  | <i>Tlr2</i>     | <i>Rnd3</i>          |
| <i>Tapbp</i>     | <i>Wwp1</i>    | <i>Ccdc130</i> | <i>Map3k8</i>   | <i>Spsb1</i>         |
| <i>Zcchc6</i>    |                | <i>Phkg2</i>   | <i>Cxcl3</i>    | <i>Mfsd2a</i>        |
| <i>Trim25</i>    |                | <i>Taf1d</i>   | <i>Ccrl2</i>    |                      |
| <i>Tgtp1</i>     |                | <i>Creld2</i>  | <i>Parp14</i>   |                      |
| <i>Xdh</i>       |                | <i>Bat4</i>    | <i>Gbp3</i>     |                      |
| <i>AI607873</i>  |                | <i>Snhg1</i>   | <i>Plek</i>     |                      |
| <i>Ifi205</i>    |                |                | <i>Clec4e</i>   |                      |
| <i>Gbp6</i>      |                |                | <i>Stx11</i>    |                      |
| <i>Traf1d</i>    |                |                | <i>Igsf6</i>    |                      |
| <i>Gadd45g</i>   |                |                | <i>Nfkbiz</i>   |                      |
| <i>Tor1aip2</i>  |                |                | <i>Niacr1</i>   |                      |
| <i>Usp18</i>     |                |                | <i>Gpr84</i>    |                      |
| <i>Ifi202b</i>   |                |                |                 |                      |
| <i>Tcirg1</i>    |                |                |                 |                      |
| <i>Azi2</i>      |                |                |                 |                      |
| <i>Ddx24</i>     |                |                |                 |                      |
| <i>Tor3a</i>     |                |                |                 |                      |
| <i>Sfmbt2</i>    |                |                |                 |                      |
| <i>Nub1</i>      |                |                |                 |                      |
| <i>Irgm2</i>     |                |                |                 |                      |
| <i>Gbp3</i>      |                |                |                 |                      |
| <i>Samhd1</i>    |                |                |                 |                      |
| <i>Akap8</i>     |                |                |                 |                      |
| <i>Adar</i>      |                |                |                 |                      |
| <i>Ube216</i>    |                |                |                 |                      |
| <i>Isg20</i>     |                |                |                 |                      |
| <i>Rsad2</i>     |                |                |                 |                      |
| <i>Nampt</i>     |                |                |                 |                      |
| <i>Iigp1</i>     |                |                |                 |                      |
| <i>Psme2b-ps</i> |                |                |                 |                      |
| <i>Nmi</i>       |                |                |                 |                      |

*Ifitm3*  
*Isoc1*  
*Pel1*  
*5-Mar*  
*Ifi35*  
*Ifih1*  
*Pnpt1*  
*Ogfr*  
*Uba7*  
*Ftsjd2*  
*Rnf19b*  
*Etnk1*  
*Ccdc6*  
*N4bp1*  
*Znfx1*

---

**Supplementary Table 2. Manually assigned gold standard TFs directly associated with five different stimulants in published literature.**

| <b>List of gold standard TFs</b> |                |                    |               |                                |
|----------------------------------|----------------|--------------------|---------------|--------------------------------|
| <b>Interferon</b>                | <b>IL-4</b>    | <b>Tunicamycin</b> | <b>GH</b>     | <b>TGF-<math>\beta</math>1</b> |
| <i>Irf9</i>                      | <i>Stat6</i>   | <i>Atf6</i>        | <i>Pou1f1</i> | <i>Smad6</i>                   |
| <i>Irf2</i>                      | <i>Nfatc2</i>  | <i>Ddit3</i>       | <i>Lhx3</i>   | <i>Smad7</i>                   |
| <i>Irf1</i>                      | <i>Stat4</i>   | <i>Xbp1</i>        | <i>Sox3</i>   | <i>Tgif1</i>                   |
| <i>Irf3</i>                      | <i>Bcl6</i>    | <i>Atf4</i>        | <i>Nr5a2</i>  | <i>Postn</i>                   |
| <i>Irf7</i>                      | <i>Gfi1</i>    | <i>Cebpg</i>       | <i>Nr2f2</i>  | <i>Smad2</i>                   |
| <i>Stat2</i>                     | <i>Nfatc3</i>  | <i>Cebpb</i>       | <i>Nr5a1</i>  | <i>Msx1</i>                    |
| <i>Irf8</i>                      | <i>Nfatc1</i>  | <i>Cebpa</i>       | <i>Nfya</i>   | <i>Smad3</i>                   |
| <i>Ifi47</i>                     | <i>Maf</i>     | <i>Hp</i>          | <i>Pcbp1</i>  | <i>Sox17</i>                   |
| <i>Irf5</i>                      | <i>Gata3</i>   | <i>Hlf</i>         | <i>Nfic</i>   | <i>Smad9</i>                   |
| <i>Stat1</i>                     | <i>Irf1</i>    | <i>Rfx1</i>        | <i>Tff3</i>   | <i>Smad4</i>                   |
| <i>Zfp143</i>                    | <i>Tff3</i>    | <i>Gabpa</i>       | <i>Sf1</i>    | <i>Foxh1</i>                   |
| <i>Rfx5</i>                      | <i>Irf5</i>    | <i>Nrf1</i>        | <i>Esr1</i>   | <i>Smad5</i>                   |
| <i>Irf4</i>                      | <i>Tcfec</i>   | <i>Nfic</i>        | <i>Hmga2</i>  | <i>Smad1</i>                   |
| <i>Prdm1</i>                     | <i>Pou2af1</i> | <i>Jun</i>         | <i>Pgr</i>    | <i>Tff3</i>                    |
| <i>Stat4</i>                     | <i>Prdm1</i>   | <i>Postn</i>       | <i>Rxra</i>   | <i>Pax3</i>                    |
| <i>Xbp1</i>                      | <i>Ikzf1</i>   | <i>Nfe2l1</i>      | <i>Hoxa5</i>  | <i>Lef1</i>                    |
| <i>Hmga2</i>                     | <i>Cebpg</i>   | <i>Nfkb1</i>       | <i>Ar</i>     | <i>Ctfl</i>                    |
| <i>Atf3</i>                      | <i>Postn</i>   | <i>Irf2</i>        | <i>Dmrt1</i>  | <i>Cebpd</i>                   |
| <i>Ets2</i>                      | <i>Irf4</i>    | <i>Usf1</i>        | <i>Zfp148</i> | <i>Zeb1</i>                    |
| <i>Rel</i>                       | <i>Aire</i>    | <i>Srebf1</i>      | <i>Casr</i>   | <i>Hmga2</i>                   |
| <i>Hmga1</i>                     | <i>Foxp1</i>   | <i>Arnt</i>        | <i>Nkx2-1</i> | <i>Cebpg</i>                   |
| <i>Rfx1</i>                      | <i>Rbpj</i>    | <i>Nfe2l2</i>      | <i>Fosb</i>   | <i>Cebpb</i>                   |
| <i>Sfpi1</i>                     | <i>Irf8</i>    | <i>Nfe2</i>        | <i>Etv4</i>   | <i>Atf3</i>                    |
| <i>Myb</i>                       | <i>Junb</i>    | <i>Ahr</i>         | <i>Nr3c1</i>  | <i>Elk4</i>                    |
| <i>Rfxank</i>                    | <i>Pou2f2</i>  | <i>Itgal</i>       | <i>Ikzf1</i>  | <i>Nfatc3</i>                  |
| <i>Aire</i>                      | <i>Pou6f1</i>  | <i>Fosb</i>        | <i>Atf3</i>   | <i>Zbtb7b</i>                  |
| <i>Nfatc2</i>                    | <i>Rel</i>     | <i>Hif1a</i>       | <i>Yy1</i>    | <i>Nfatc1</i>                  |
| <i>Stat3</i>                     | <i>Yy1</i>     | <i>Sp2</i>         | <i>Gr</i>     | <i>Sox4</i>                    |
| <i>Gfi1</i>                      | <i>Srf</i>     | <i>Max</i>         | <i>Jund</i>   | <i>Cux1</i>                    |
| <i>Cebpe</i>                     | <i>Stat1</i>   | <i>Pou2f3</i>      | <i>Rfx1</i>   | <i>Cebpa</i>                   |
| <i>Ikzf1</i>                     | <i>Irf2</i>    | <i>Foxo1</i>       | <i>Sp2</i>    | <i>Mxd1</i>                    |
| <i>Gata3</i>                     | <i>Hp</i>      | <i>Pou1f1</i>      | <i>Myb</i>    | <i>Max</i>                     |
| <i>Traf4</i>                     | <i>Mtf1</i>    | <i>Sp3</i>         | <i>Stat5b</i> | <i>Tcf3</i>                    |
| <i>Pou2f3</i>                    | <i>Foxp3</i>   | <i>En1</i>         | <i>Hmga1</i>  | <i>Hmga1</i>                   |
| <i>Fli1</i>                      | <i>Gata1</i>   | <i>Sp4</i>         | <i>Mybl2</i>  | <i>Pax8</i>                    |
| <i>Ddit3</i>                     | <i>Stat5a</i>  | <i>Runx2</i>       | <i>Stat5a</i> | <i>Pdx1</i>                    |
| <i>Bach2</i>                     | <i>Pax5</i>    | <i>Gli2</i>        | <i>Vdr</i>    | <i>Foxd1</i>                   |

|               |                |              |                |                |
|---------------|----------------|--------------|----------------|----------------|
| <i>Nfkb1</i>  | <i>Runx3</i>   | <i>Sp1</i>   | <i>Zeb1</i>    | <i>Ttf1</i>    |
| <i>Elk4</i>   | <i>Rest</i>    | <i>Creb1</i> | <i>Hp</i>      | <i>Nfic</i>    |
| <i>Gabpa</i>  | <i>Jund</i>    | <i>Egr1</i>  | <i>Dbp</i>     | <i>Hoxa4</i>   |
| <i>Hp</i>     | <i>Zbtb16</i>  | <i>Myc</i>   | <i>Rest</i>    | <i>Myc</i>     |
| <i>Etv4</i>   | <i>Crem</i>    | <i>Foxh1</i> | <i>Pitx2</i>   | <i>Usf2</i>    |
| <i>Hlf</i>    | <i>Cebpa</i>   |              | <i>Ctfl</i>    | <i>Nfya</i>    |
| <i>Cux1</i>   | <i>Ppard</i>   |              | <i>Ppard</i>   | <i>Elk3</i>    |
| <i>Alx1</i>   | <i>Atf3</i>    |              | <i>Cebpd</i>   | <i>Zfp354c</i> |
| <i>Zbtb16</i> | <i>Stat5b</i>  |              | <i>Hoxa</i>    | <i>Mycn</i>    |
| <i>Mtf1</i>   | <i>Mafb</i>    |              | <i>Rara</i>    | <i>Gcm1</i>    |
| <i>Nfl</i>    | <i>Ikzf2</i>   |              | <i>Bcl6</i>    | <i>Etv4</i>    |
| <i>Foxa3</i>  | <i>Fosb</i>    |              | <i>Elk1</i>    | <i>Hoxa</i>    |
| <i>Pou2f2</i> | <i>Gata2</i>   |              | <i>Ets1</i>    | <i>Mxi1</i>    |
| <i>Rest</i>   | <i>Traf4</i>   |              | <i>Pparg</i>   | <i>Runx3</i>   |
| <i>Elk1</i>   | <i>Sp2</i>     |              | <i>Foxfla</i>  | <i>E2f5</i>    |
| <i>Ap3b1</i>  | <i>Itgal</i>   |              | <i>Hoxa4</i>   | <i>Mxd4</i>    |
| <i>Pou2f1</i> | <i>Nfe2</i>    |              | <i>Junb</i>    | <i>E2f4</i>    |
| <i>Maf</i>    | <i>Fos</i>     |              | <i>Hoxa3</i>   | <i>Itgal</i>   |
| <i>Erg</i>    | <i>Zbtb7b</i>  |              | <i>Foxm1</i>   | <i>Rara</i>    |
| <i>Nfatc1</i> | <i>Stat2</i>   |              | <i>Tcfap2a</i> | <i>Sfn</i>     |
| <i>Foxf2</i>  | <i>Foxa2</i>   |              | <i>Nfyb</i>    | <i>Pou6f1</i>  |
| <i>Qrs11</i>  | <i>Nkx2-1</i>  |              | <i>Sox9</i>    | <i>Nkx3-1</i>  |
| <i>Foxm1</i>  | <i>Nfil3</i>   |              | <i>Gata2</i>   | <i>Gtf2i</i>   |
| <i>Tff3</i>   | <i>Fosl2</i>   |              | <i>Hes1</i>    | <i>Foxj1</i>   |
| <i>Tcf7</i>   | <i>Onecut2</i> |              | <i>Ttf1</i>    | <i>Nfatc2</i>  |
| <i>Sfl</i>    | <i>Xbp1</i>    |              | <i>Aire</i>    | <i>Erf</i>     |
| <i>Mycn</i>   | <i>Tcf7</i>    |              | <i>Ppara</i>   | <i>Cdx2</i>    |
| <i>Deaf1</i>  | <i>Lef1</i>    |              | <i>Nfatc1</i>  | <i>Myb</i>     |
| <i>Smad7</i>  | <i>Irf7</i>    |              | <i>Lef1</i>    | <i>Foxc1</i>   |
| <i>Spz1</i>   | <i>Nfia</i>    |              | <i>Gfi1</i>    | <i>Tcfap2a</i> |
| <i>Foxa1</i>  | <i>Max</i>     |              | <i>Erf</i>     | <i>Atf1</i>    |
| <i>Foxfla</i> | <i>Myog</i>    |              | <i>Nfatc3</i>  | <i>Pitx2</i>   |
| <i>Jund</i>   | <i>Sfpi1</i>   |              | <i>Foxa2</i>   | <i>Nfe2l3</i>  |
| <i>Foxp3</i>  | <i>Smad7</i>   |              | <i>Tcf7l2</i>  | <i>Hoxa5</i>   |
| <i>Bcl6</i>   | <i>Mxd1</i>    |              | <i>Max</i>     | <i>Foxa1</i>   |
| <i>Usf1</i>   | <i>Pparg</i>   |              | <i>Hoxa7</i>   | <i>Onecut2</i> |
| <i>Mef2d</i>  | <i>Smad1</i>   |              | <i>Nr1h2</i>   | <i>Mxd3</i>    |
| <i>Atf1</i>   | <i>Stat3</i>   |              | <i>Hnf4a</i>   | <i>Zbtb16</i>  |
| <i>Stat5a</i> | <i>Kitl</i>    |              | <i>Sp4</i>     | <i>Mybl2</i>   |
| <i>Sp2</i>    | <i>Hes1</i>    |              | <i>Tcf4</i>    | <i>Gfi1</i>    |
| <i>Stat5b</i> | <i>Gata6</i>   |              | <i>Wt1</i>     | <i>Rfxank</i>  |
| <i>Mpp1</i>   | <i>Creb1</i>   |              | <i>Gata3</i>   | <i>Sox10</i>   |
| <i>Crem</i>   | <i>En1</i>     |              | <i>Onecut1</i> | <i>Tef</i>     |

|               |               |               |                |
|---------------|---------------|---------------|----------------|
| <i>Stat6</i>  | <i>Ets2</i>   | <i>Foxj1</i>  | <i>Onecut1</i> |
| <i>Nrf1</i>   | <i>Ets1</i>   | <i>Qrsl1</i>  | <i>Tcf7</i>    |
| <i>Cebpg</i>  | <i>Cebpb</i>  | <i>Foxh1</i>  | <i>Ovol2</i>   |
| <i>Mitf</i>   | <i>Jun</i>    | <i>Pax5</i>   | <i>Fosb</i>    |
| <i>Hltf</i>   | <i>Elk4</i>   | <i>Stat3</i>  | <i>Atf4</i>    |
| <i>Ets1</i>   | <i>Pxn</i>    | <i>Ap3b1</i>  | <i>Foxa2</i>   |
| <i>Cebpd</i>  | <i>Gli2</i>   | <i>Sp3</i>    | <i>Fosl2</i>   |
| <i>Pr</i>     | <i>Sox2</i>   | <i>Foxo4</i>  | <i>Rest</i>    |
| <i>Mxd3</i>   | <i>Wt1</i>    | <i>Cebpa</i>  | <i>Hoxa7</i>   |
| <i>Hoxa9</i>  | <i>Hnf1a</i>  | <i>Foxo1</i>  | <i>Nfyb</i>    |
| <i>Tcfec</i>  | <i>Elf1</i>   | <i>E2f3</i>   | <i>Gr</i>      |
| <i>Max</i>    | <i>Nf1</i>    | <i>Irf1</i>   | <i>E2f3</i>    |
| <i>Mzf1</i>   | <i>Smad3</i>  | <i>Egr1</i>   | <i>Nfe2</i>    |
| <i>Pou1f1</i> | <i>Rara</i>   | <i>Maf</i>    | <i>Pgr</i>     |
| <i>Pdlim5</i> | <i>Rfx5</i>   | <i>Cebpb</i>  | <i>Ppard</i>   |
| <i>Zeb1</i>   | <i>Pax8</i>   | <i>Runx2</i>  | <i>Maf</i>     |
| <i>Pou3f1</i> | <i>Ppara</i>  | <i>Creb1</i>  | <i>Hp</i>      |
| <i>Gata2</i>  | <i>Pde6b</i>  | <i>Cebpg</i>  | <i>Gli2</i>    |
| <i>Srf</i>    | <i>Sfn</i>    | <i>Fos</i>    | <i>Zfp628</i>  |
| <i>Hsf1</i>   | <i>Mxd3</i>   | <i>Otx2</i>   | <i>Gcm2</i>    |
| <i>Nr5a2</i>  | <i>Gata4</i>  | <i>Hoxa9</i>  | <i>Jund</i>    |
| <i>Gata1</i>  | <i>Vdr</i>    | <i>Trp53</i>  | <i>Sox6</i>    |
| <i>Itgal</i>  | <i>Hif1a</i>  | <i>Irf9</i>   | <i>Junb</i>    |
| <i>Irf6</i>   | <i>Tbp</i>    | <i>Otx1</i>   | <i>Nfyc</i>    |
| <i>Hoxa4</i>  | <i>Myc</i>    | <i>Tal1</i>   | <i>E2f2</i>    |
| <i>Tgif1</i>  | <i>Ar</i>     | <i>Gli2</i>   | <i>Irf7</i>    |
| <i>Trp53</i>  | <i>Trp53</i>  | <i>Srf</i>    | <i>Esr1</i>    |
| <i>Bach1</i>  | <i>Pou2f1</i> | <i>Nfkb1</i>  | <i>Crx</i>     |
| <i>Cebpa</i>  | <i>Esr1</i>   | <i>Sfpi1</i>  | <i>Xbp1</i>    |
| <i>Gr</i>     | <i>Runx1</i>  | <i>Gata4</i>  | <i>Sp2</i>     |
| <i>Nfil3</i>  | <i>Egr1</i>   | <i>Sp1</i>    | <i>Qrsl1</i>   |
| <i>Sfn</i>    | <i>Mafk</i>   | <i>Kitl</i>   | <i>Mafg</i>    |
| <i>Foxa2</i>  | <i>Egr2</i>   | <i>Jun</i>    | <i>Irf5</i>    |
| <i>Hoxa7</i>  | <i>Qrsl1</i>  | <i>Srebf1</i> | <i>Foxa3</i>   |
| <i>Cebpb</i>  | <i>Pou5f1</i> | <i>En1</i>    | <i>Ahr</i>     |
| <i>Sp3</i>    | <i>Myod1</i>  | <i>Gli3</i>   | <i>Nfkb2</i>   |
| <i>Mxd1</i>   | <i>Sp1</i>    | <i>Brcal</i>  | <i>Casr</i>    |
| <i>Hnf1b</i>  | <i>Runx2</i>  | <i>Myc</i>    | <i>Gc</i>      |
| <i>E2f4</i>   | <i>Smad2</i>  | <i>Sox10</i>  | <i>Desp2</i>   |
| <i>Hoxa</i>   | <i>Casr</i>   | <i>Ahr</i>    | <i>Erg</i>     |
| <i>Myc</i>    | <i>Ahr</i>    | <i>Myf6</i>   | <i>Egr1</i>    |
| <i>Pax5</i>   | <i>Ctfl</i>   | <i>Stat1</i>  | <i>Maz</i>     |
| <i>Hnf1a</i>  | <i>Srebf1</i> | <i>Myog</i>   | <i>E2f1</i>    |

|                |               |              |               |
|----------------|---------------|--------------|---------------|
| <i>Nr3c1</i>   | <i>E2f1</i>   | <i>Stat2</i> | <i>Irf8</i>   |
| <i>Junb</i>    | <i>Rxra</i>   | <i>Sox2</i>  | <i>Ap3b1</i>  |
| <i>E2f5</i>    | <i>Nr3c1</i>  | <i>Stat4</i> | <i>Irf1</i>   |
| <i>Tfdp1</i>   | <i>Cdx2</i>   | <i>Pax6</i>  | <i>Foxp3</i>  |
| <i>Ttf1</i>    | <i>Elk1</i>   | <i>Pr</i>    | <i>Stra13</i> |
| <i>Crx</i>     | <i>Nr1i2</i>  | <i>Hnf1b</i> | <i>Dmrt1</i>  |
| <i>Mafb</i>    | <i>Cbfb</i>   | <i>Foxn1</i> | <i>Atf2</i>   |
| <i>Rara</i>    | <i>Sp4</i>    | <i>Tbp</i>   | <i>Ikzf2</i>  |
| <i>Zbtb7b</i>  | <i>Foxo3</i>  | <i>Nf1</i>   | <i>Gfi1b</i>  |
| <i>Postn</i>   | <i>Myb</i>    | <i>Pxn</i>   | <i>Gabpa</i>  |
| <i>Sp1</i>     | <i>Hltf</i>   | <i>Stat6</i> | <i>Tcf7l2</i> |
| <i>Hoxa5</i>   | <i>Ebf2</i>   | <i>Tal2</i>  | <i>Yy1</i>    |
| <i>Fosb</i>    | <i>Tead1</i>  | <i>Gata1</i> | <i>Pou2f2</i> |
| <i>Tcfap2a</i> | <i>Hmga2</i>  | <i>Foxo3</i> | <i>Irf3</i>   |
| <i>Runx1</i>   | <i>Sf1</i>    | <i>Itgal</i> | <i>Fosl1</i>  |
| <i>Foxh1</i>   | <i>Foxh1</i>  | <i>Hnf1a</i> | <i>Arnt</i>   |
| <i>Glis1</i>   | <i>Pax4</i>   |              | <i>Rora</i>   |
| <i>Dmrt1</i>   | <i>Atf2</i>   |              | <i>Srf</i>    |
| <i>Cdc37</i>   | <i>Etv4</i>   |              | <i>Egr3</i>   |
| <i>Gata6</i>   | <i>Gr</i>     |              | <i>Tlx2</i>   |
| <i>Dbp</i>     | <i>Erg</i>    |              | <i>Rarg</i>   |
| <i>Smad4</i>   | <i>Pou2f3</i> |              | <i>Trp53</i>  |
| <i>Pou5f1</i>  | <i>Hmga1</i>  |              | <i>Mafk</i>   |
| <i>Runx3</i>   | <i>Ap3b1</i>  |              | <i>Etv6</i>   |
| <i>E2f2</i>    | <i>Cp2</i>    |              | <i>Sox3</i>   |
| <i>Pparg</i>   |               |              | <i>Stat1</i>  |
| <i>Pou4f1</i>  |               |              | <i>Nr1h3</i>  |
| <i>Rbpj</i>    |               |              | <i>Ar</i>     |
| <i>Rarg</i>    |               |              | <i>Rxra</i>   |
| <i>Gata4</i>   |               |              | <i>Sox9</i>   |
| <i>Gc</i>      |               |              | <i>Nfe2l1</i> |
| <i>Fos</i>     |               |              | <i>Lhx3</i>   |
| <i>Myod1</i>   |               |              | <i>Elk1</i>   |
| <i>Foxo3</i>   |               |              | <i>Hes1</i>   |
| <i>Sox2</i>    |               |              | <i>Mtf1</i>   |
| <i>Smad3</i>   |               |              | <i>Arnt2</i>  |
| <i>Vdr</i>     |               |              | <i>Jun</i>    |
| <i>En1</i>     |               |              | <i>Zfx3</i>   |
| <i>Jun</i>     |               |              | <i>Foxm1</i>  |
| <i>Ppara</i>   |               |              | <i>Sp3</i>    |
| <i>Pxn</i>     |               |              | <i>Gata1</i>  |
| <i>E2f3</i>    |               |              | <i>Rxb</i>    |
| <i>Kitl</i>    |               |              | <i>Gata2</i>  |

*Ppard*  
*Ahr*  
*Smad2*  
*Msx1*  
*Tbp*  
*Brcal*  
*Hes1*  
*Ar*  
*Creb1*  
*Egr2*  
*Hif1a*  
*Esr1*  
*Nkx2-1*  
*Smad5*  
*E2f1*  
*Nhlh1*  
*Runx2*  
*Nfe2l2*  
*Tpx2*  
*Egr1*  
*Foxd1*  
*Rxb*  
*Pgr*  
*Srebf1*  
*Myf5*  
*Hnf4a*  
*Nr1i2*  
*Pax6*  
*Gli2*  
*Rxra*  
*Casr*  
*Pde6b*  
*Cdx2*  
*Arnt*  
*Gli3*  
*Hoxa3*  
*Smad9*  
*Pax2*  
*Wt1*  
*Arnt2*  
*Ebf2*  
*Rax*  
*Ctf1*

*Nfkb1*  
*Nr5a1*  
*Pou1f1*  
*Hnf1b*  
*Tcfe3*  
*Ep300*  
*Bcl6*  
*Fos*  
*Nkx2-1*  
*Cbfb*  
*Nr2f1*  
*Fli1*  
*Stat3*  
*Nanog*  
*Tbx5*  
*Dbp*  
*Pxn*  
*Pcbp1*  
*Rel*  
*Elf1*  
*Sp1*  
*Stat4*  
*Hoxa9*  
*Gata3*  
*Mef2a*  
*Runx1*  
*Stat5a*  
*Creb1*  
*Zic1*  
*Wt1*  
*Hif1a*  
*Pou3f3*  
*Irf4*  
*Srebf1*  
*Gli1*  
*Stat6*  
*Hnf1a*  
*Tcf4*  
*Ppara*  
*Hsf1*  
*Vdr*  
*Nr1i3*  
*Pax2*



*Runx2*  
*Gata6*  
*Nf1*  
*Mef2d*  
*Tal1*  
*Pou5f1*  
*Hnf4a*  
*Mitf*  
*Pou3f1*  
*Sf1*  
*Nr1i2*  
*Brca1*  
*Nfe2l2*  
*Tcfcb*  
*Myf5*  
*Tead1*  
*Usf1*  
*Kitl*  
*Nr2f2*  
*Stat5b*  
*Gata4*  
*Pax6*  
*Gli3*  
*Sox2*  
*Egr2*  
*Sfp1*  
*Sry*  
*Pr*  
*Myog*  
*Mef2c*  
*Gata5*  
*Nkx2-5*  
*Pax5*  
*Foxo3*  
*Tbp*  
*Ebf2*  
*En1*  
*Myf6*  
*Meis1*  
*Pbx1*  
*Ets2*  
*Hlf*  
*Otx2*

*Ascl1*  
*Myod1*  
*Ets1*  
*Foxo1*  
*Hic1*

---
